# Supplementary material for: Insight into excitation-related luminescence properties of carbon dots: synergistic effect from photoluminescence centers in the carbon core and on the surface
Source: Royal Society of Chemistry journal article supplement (doi:10.1039/c6ra20562c), 2016-01-01
Supplement: c6ra20562c1.pdf [file c6ra20562c1.pdf]

**Insight into excitation–related luminescence properties of carbon dots: synergistic effect from photoluminescence centers in carbon core and on the surface**

Bo Li,<sup>a,b</sup> Yali Guo,<sup>a</sup> Anam Iqbal,<sup>a</sup> Yaping Dong,<sup>b</sup> Wu Li,<sup>b</sup> Weisheng Liu,<sup>a</sup> Wenwu Qin,<sup>a\*</sup> Yabin Wang<sup>b\*</sup>

a Key Laboratory of Nonferrous Metal Chemistry and Resources Utilization of Gansu Province Lanzhou University, Lanzhou, 730000, P. R. China. Fax: (+86) 931-8912582 E-mail: qinww@lzu.edu.cn

b Qinghai Institute of Salt Lakes, Chinese Academy of Sciences, Xining, Qinghai 810008, P. R. China. E-mail: ybw@isl.ac.cn.

c School of chemistry and Chemical Engineering, Harbin Institute of Technology, Harbin 150001, P. R. China.

## Supporting information

### Experimental data

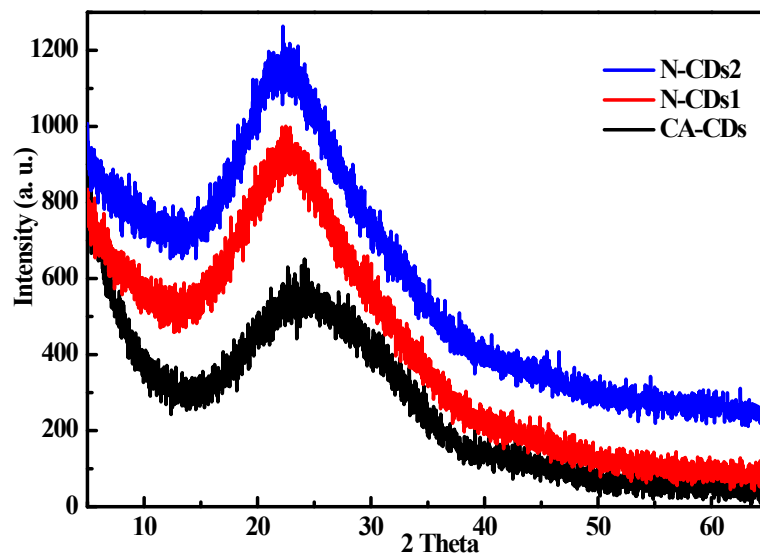

Fig. S1 XRD spectra of prepared CA-CDs, N-CDs1 and N-CDs2.

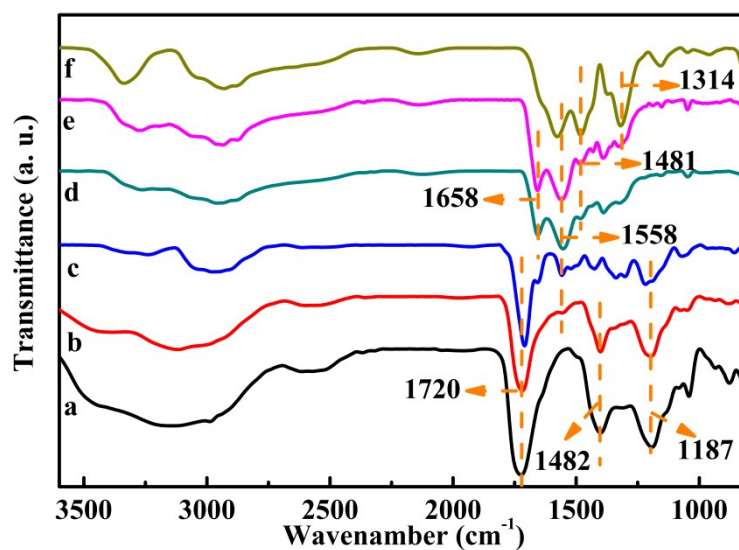

**Fig. S2** FT-IR spectra of CDs prepared with different proportion of raw materials (a) 1 mmol CA, (b) 1 mmol CA and 20  $\mu\text{L}$  EDA, (c) 1 mmol CA and 100  $\mu\text{L}$  EDA, (d) 1 mmol CA and 500  $\mu\text{L}$  EDA, (e) 1 mmol CA and 1000  $\mu\text{L}$  EDA, (f) 1 ml EDA, in 10 mL water at 160  $^{\circ}\text{C}$  for 6 h, respectively.

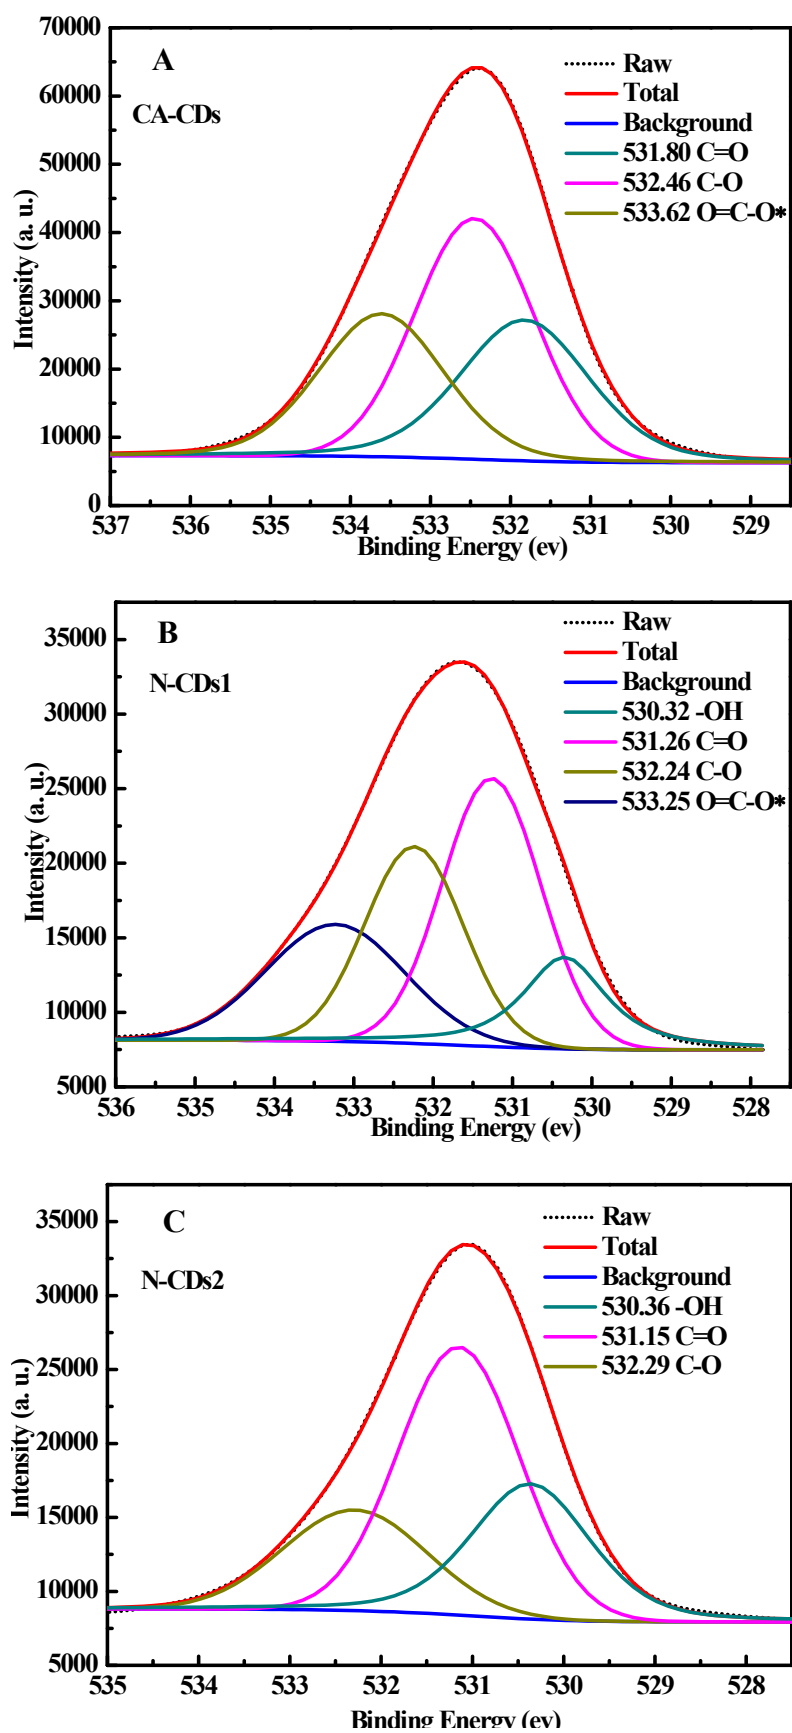

**Fig. S3** O1s high-resolution XPS spectra of prepared CA-CDs, N-CDs1 and N-CDs2.

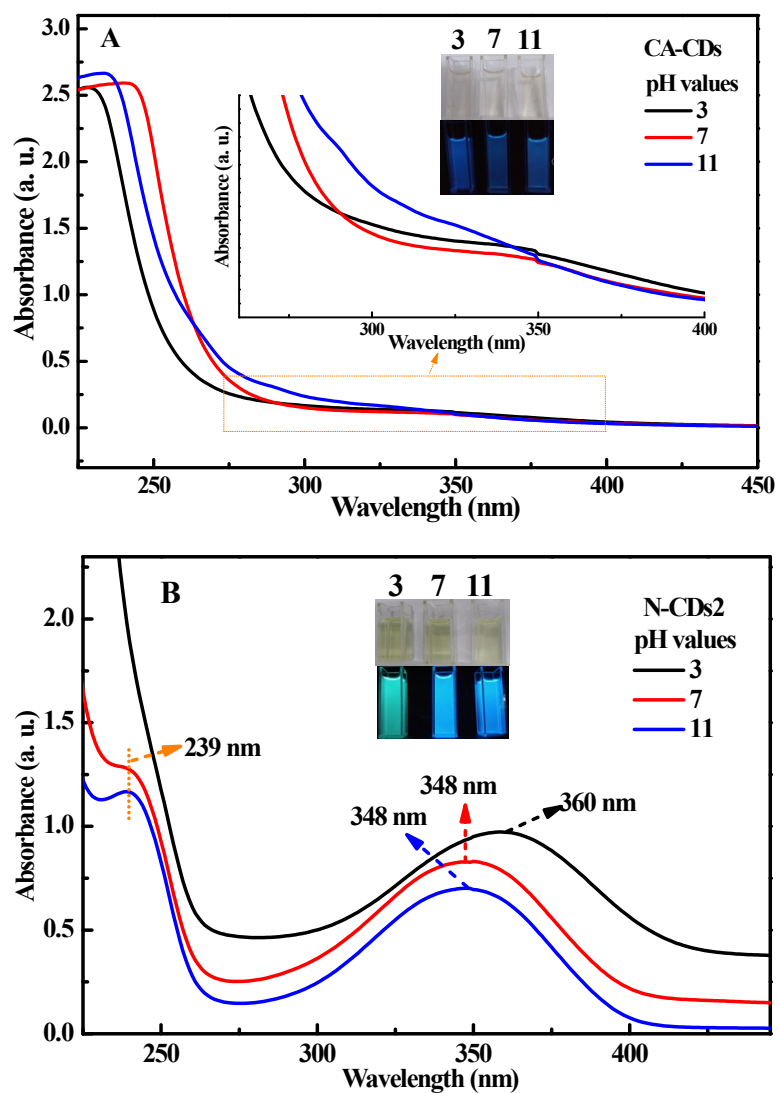

**Fig. S4** UV-vis absorption of CA-CDs (A) and N-CDs2 (B) in water solution at pH values of 3, 7 and 11. The insets are the samples under day light and UV lamp (the excitation wavelength is 365 nm).

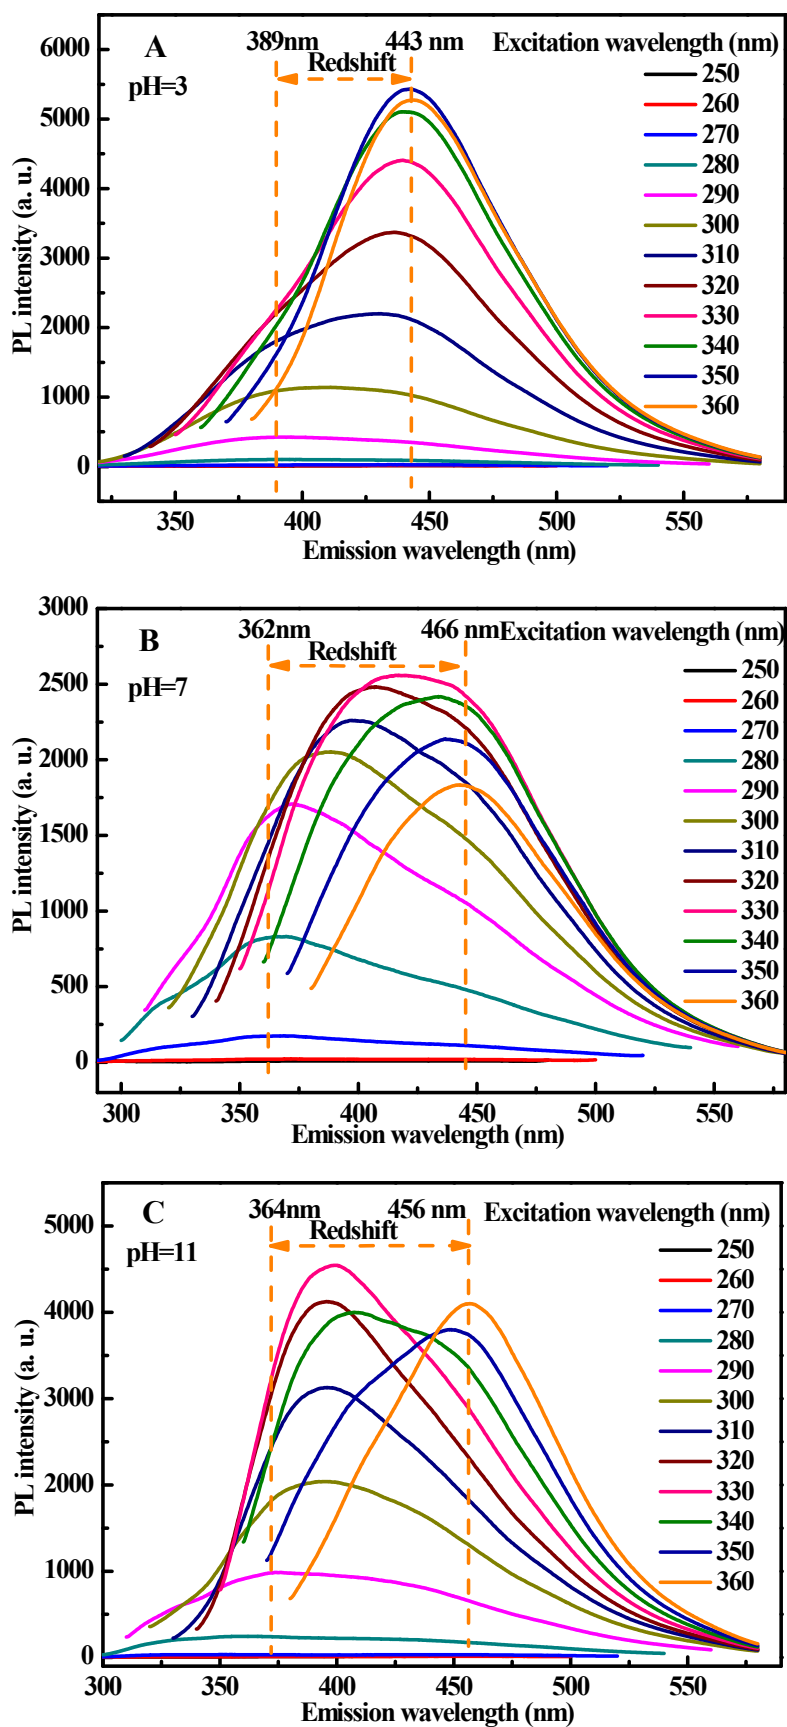

**Fig.S5** Fluorescence spectra of CA-CDs at pH 3 (A), 7 (B) and 11 (C) with excitation wavelengths from 250 nm to 360 nm.

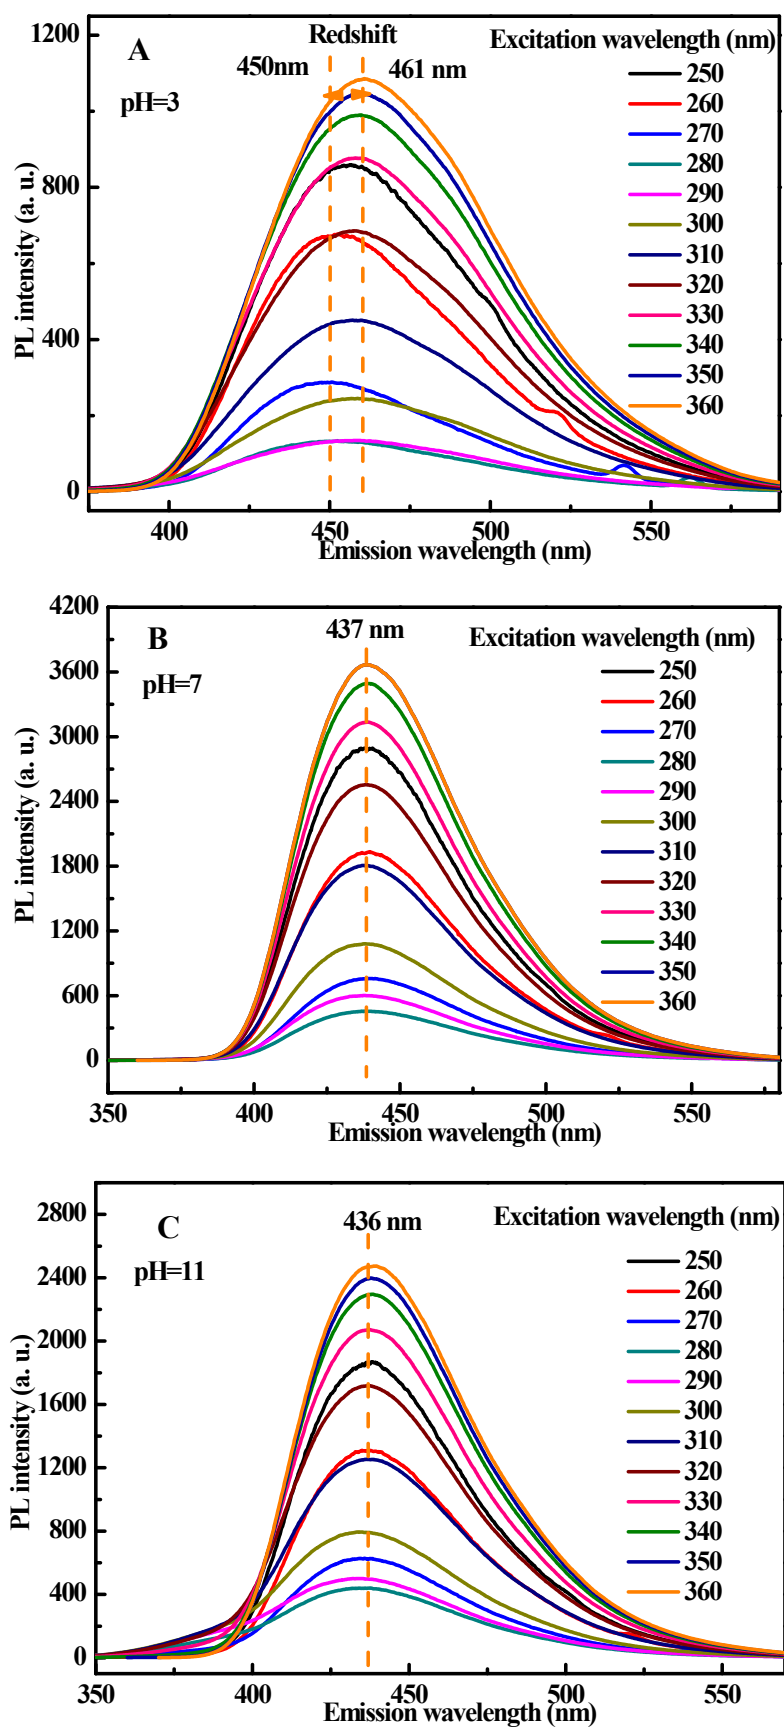

**Fig.S6** Fluorescence spectra of N-CDs2 at pH 3 (A), 7 (B) and 11 (C) with excitation wavelengths from 250 nm to 360 nm.

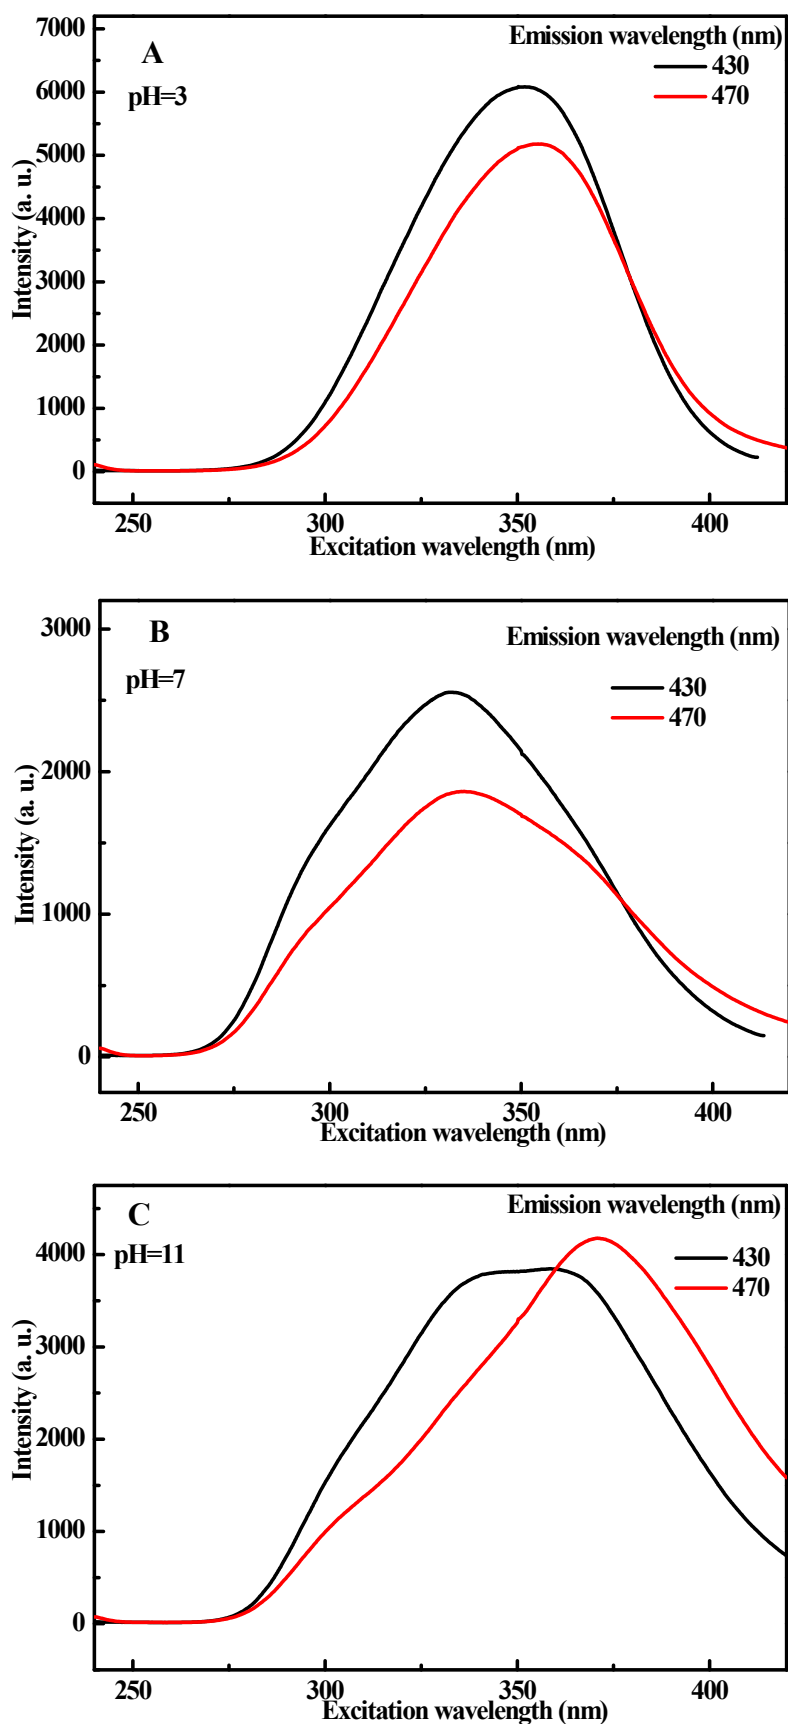

**Fig. S7** Excitation wavelengths of CA-CDs at two different emission wavelengths of 430 nm and 470 nm with pH value of 3 (A), 7(B) and 11(C)



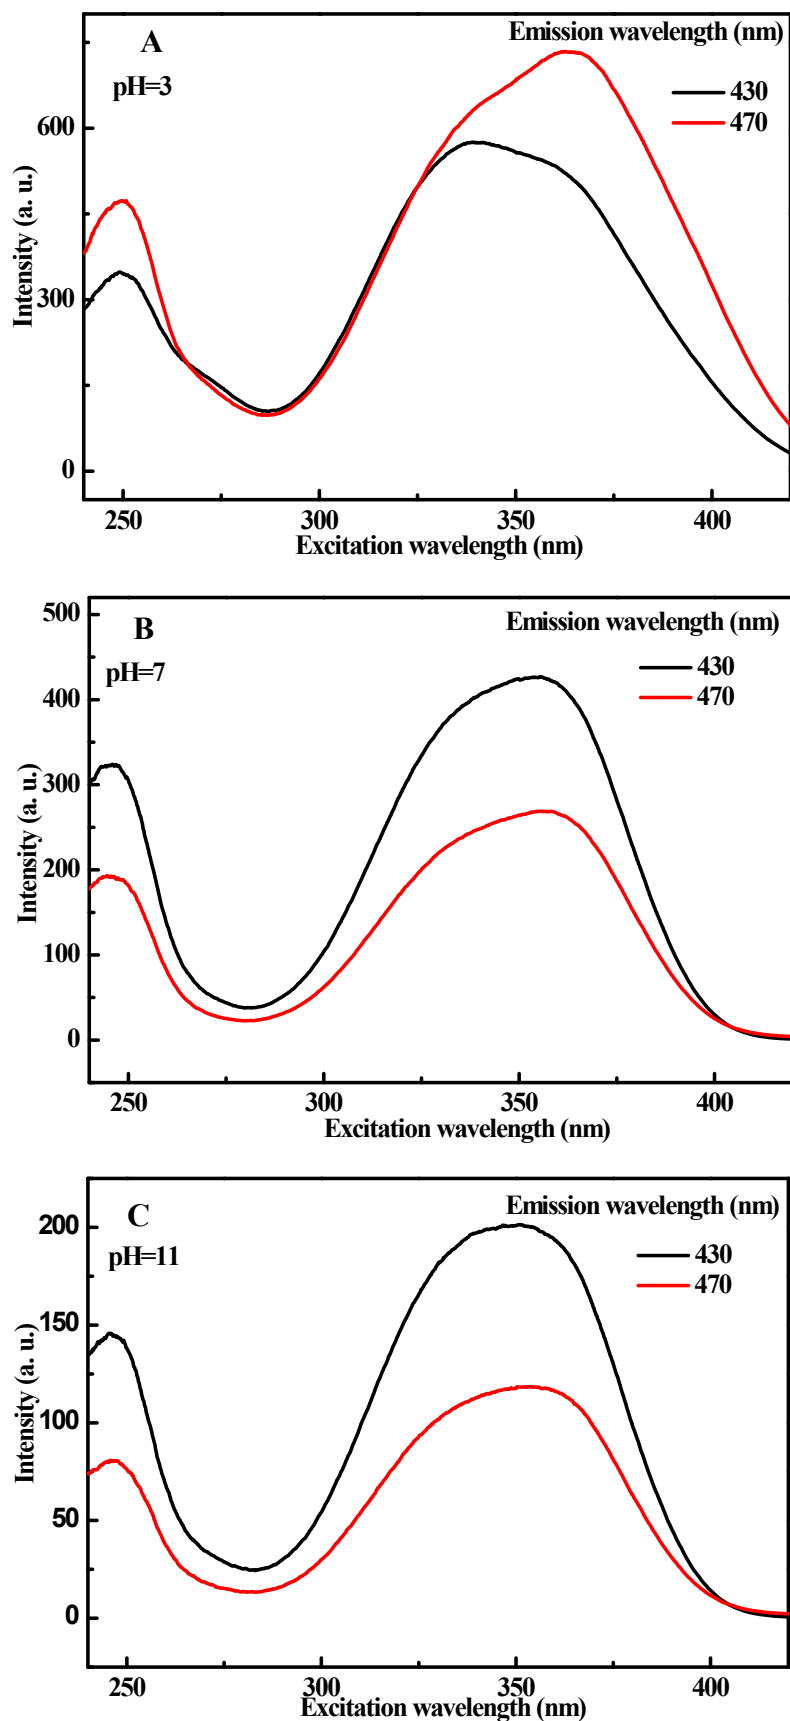

**Fig. S8** Excitation wavelengths of N-CDs1 at two different emission wavelengths of 430 nm and 470 nm with pH value of 3 (A), 7(B) and 11(C)

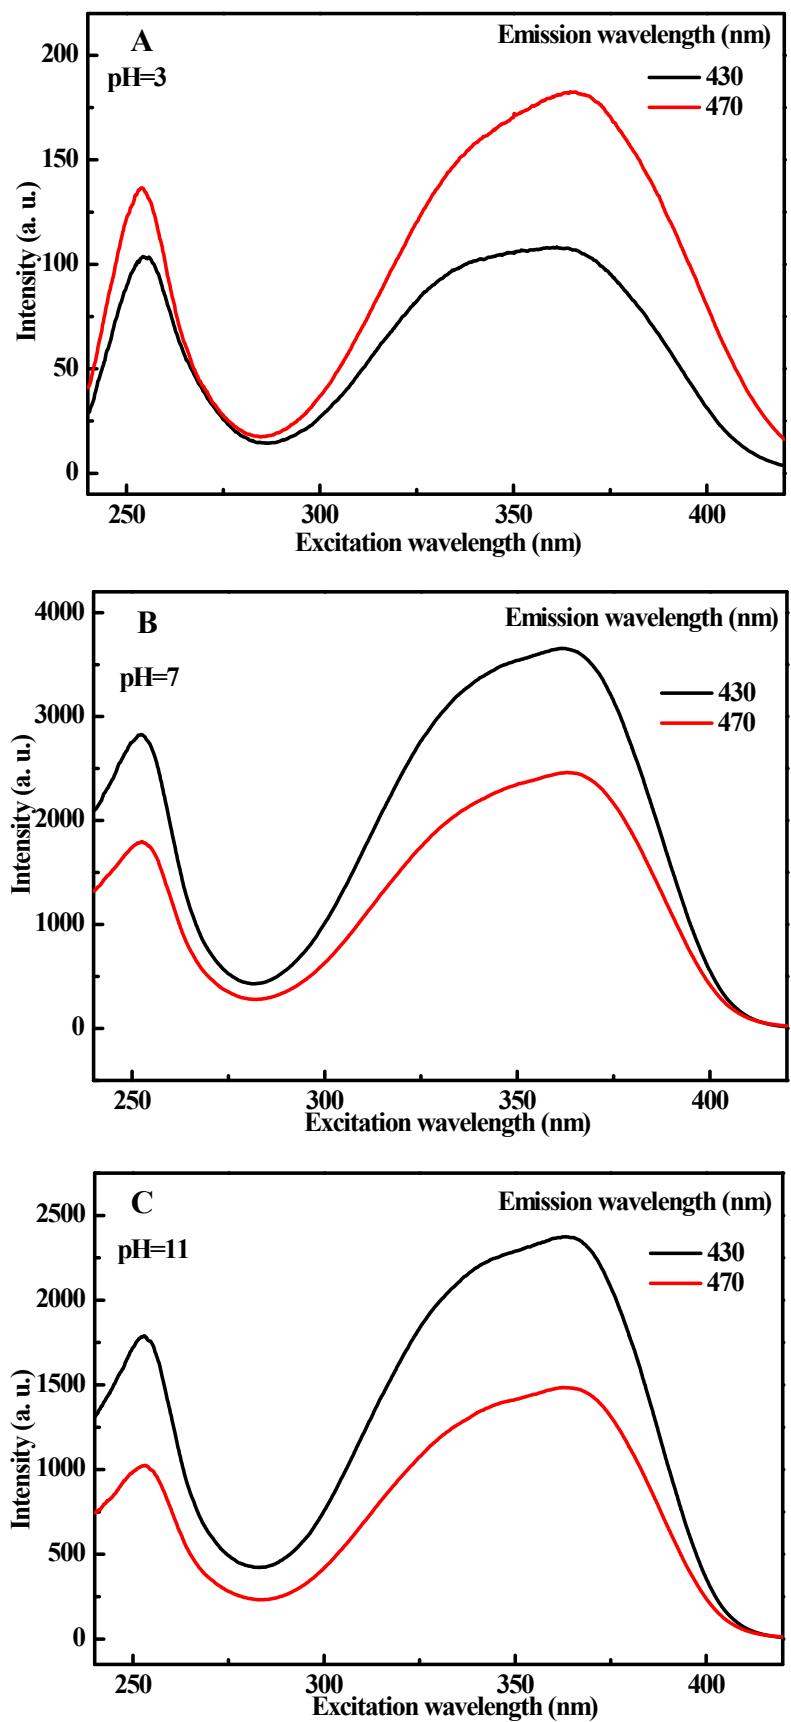

**Fig. S9** Excitation wavelengths of N-CDs2 at two different emission wavelengths of 430 nm and 470 nm with pH value of 3 (A), 7(B) and 11(C)

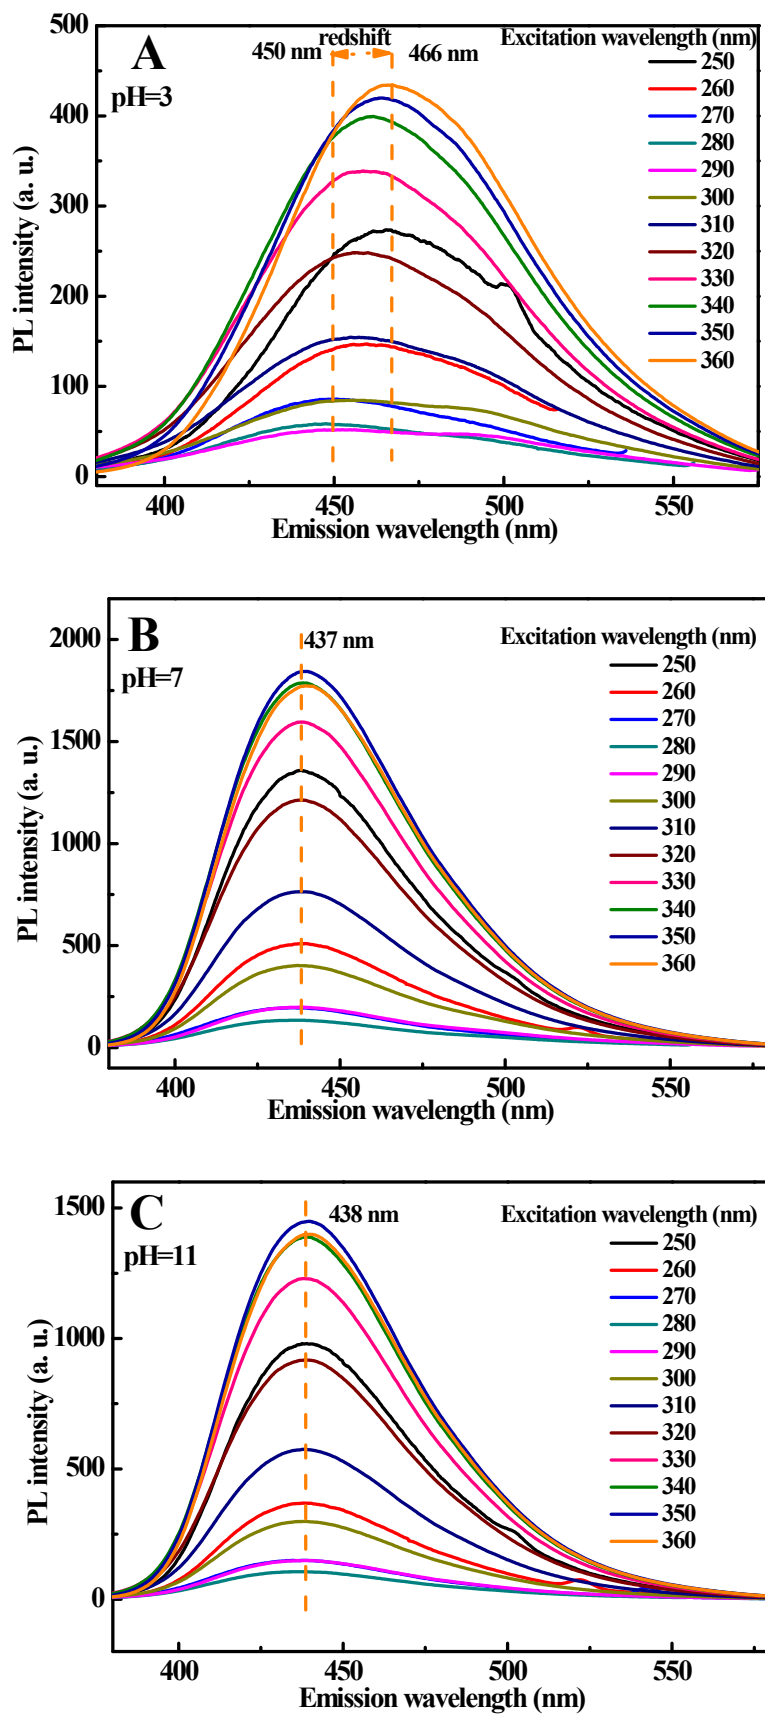

**Fig.S10** Fluorescence spectra of CDs prepared with 1 mmol CA and 100  $\mu$ L EDA at pH 3 (A), 7 (B) and 11 (C) with excitation wavelengths from 250 nm to 360 nm.

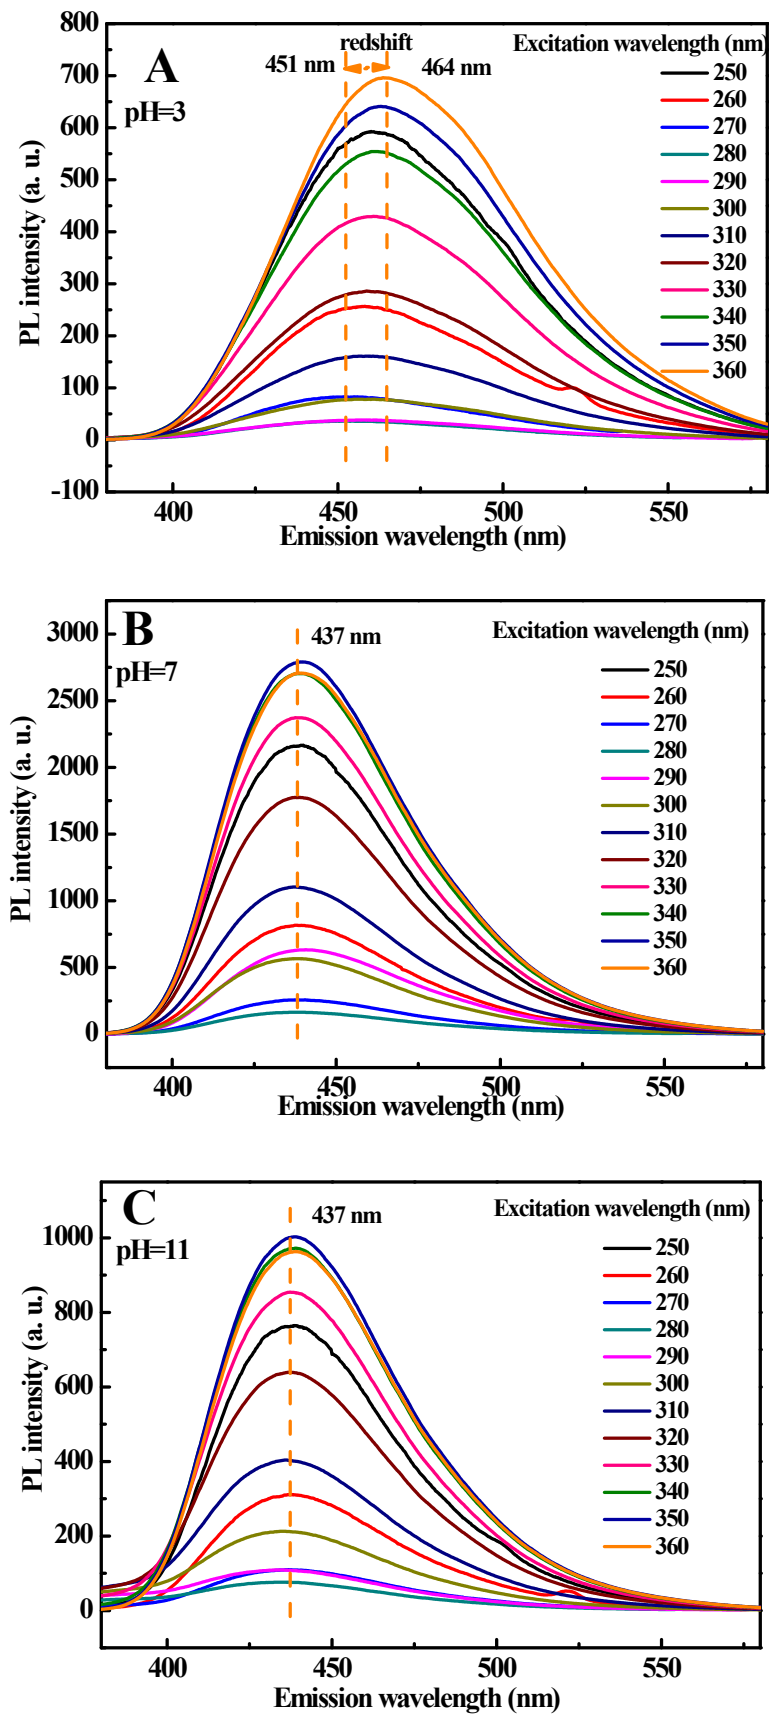

**Fig. S11** Fluorescence spectra of CDs prepared with 1 mmol CA and 500  $\mu$ L EDA at pH 3 (A), 7 (B) and 11 (C) with excitation wavelengths from 250 nm to 360 nm.

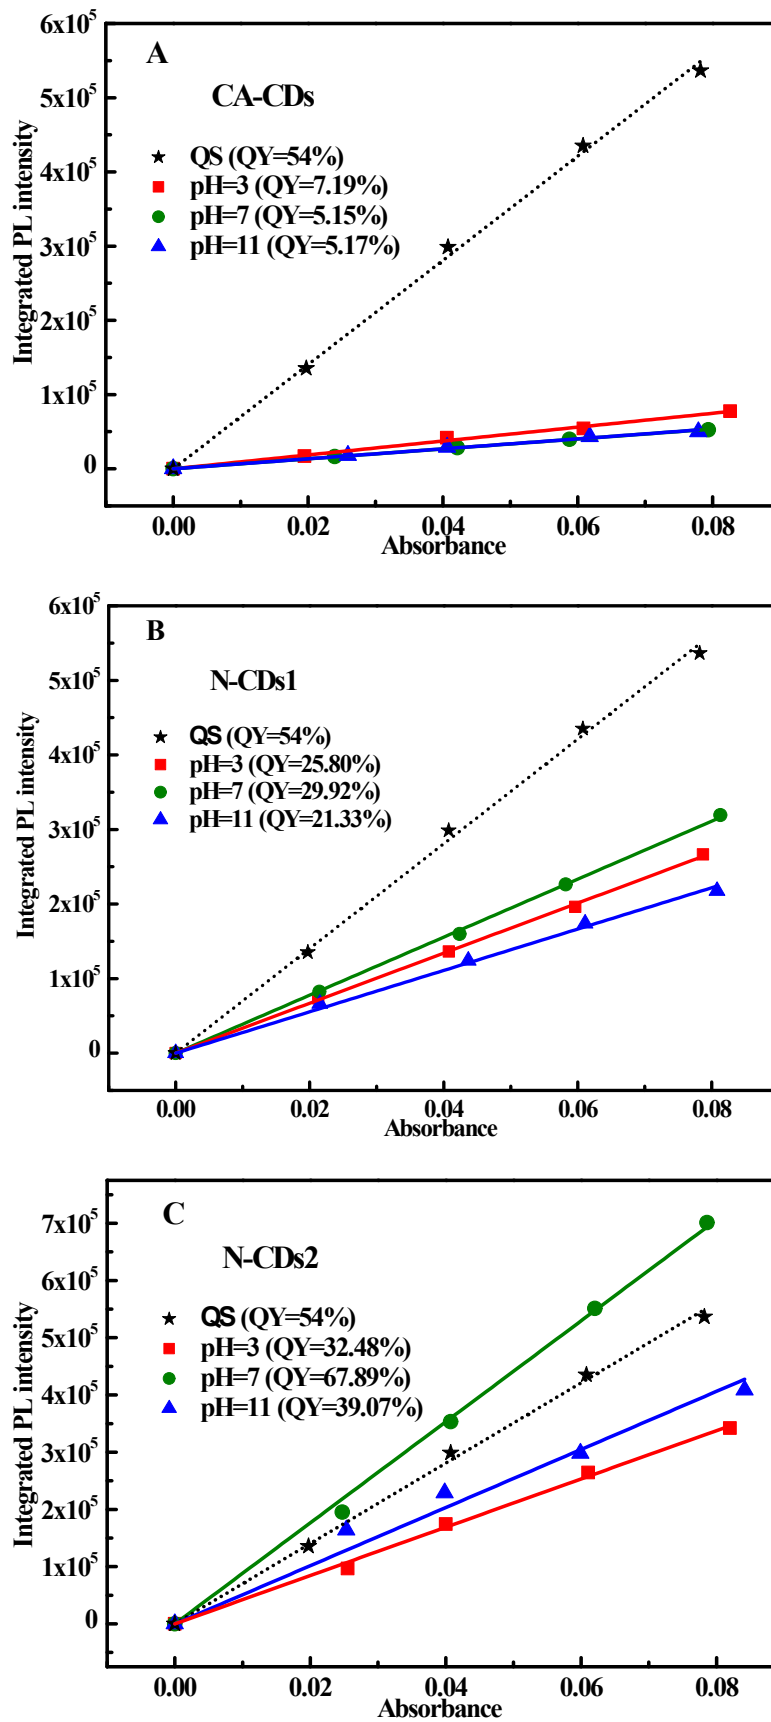

**Fig. S12** The PL quantum yield of CA-CDs (A), N-CDs1 (B) and N-CDs2 (C) at pH 3, 7 and 11 with quinine sulfate in 0.1 M H<sub>2</sub>SO<sub>4</sub> as a standard sample.

**Tab. S1** XPS component ratio analyses of prepared CDs.

| Elements | C     | O     | N     |
|----------|-------|-------|-------|
| CA-CDs   | 60.14 | 39.86 | ---   |
| N-CDs1   | 65.04 | 24.36 | 10.60 |
| N-CDs2   | 63.88 | 18.67 | 17.45 |

**Tab. S2** High-resolution XPS analyses of prepared CDs

|        | C1s         |      |      |               |                | O1s  |      |      |        | N1s            |      |                |                    |
|--------|-------------|------|------|---------------|----------------|------|------|------|--------|----------------|------|----------------|--------------------|
|        | C-C<br>/C=C | C-N  | C-OH | C-O-C<br>/C=N | O-C=O<br>(C=O) | -OH  | C=O  | C-O  | O=C-O* | Pyridinic<br>N | N-H  | Pyrroli<br>c N | N-(C) <sub>3</sub> |
| CA-CDs | 47.3        | --   | 27.6 |               | 25.1           | --   | 29.9 | 42.1 | 28.0   | --             | --   | --             | --                 |
| N-CDs1 | 45.0        | 16.3 | 15.4 | 9.6           | 13.7           | 14.6 | 36.5 | 26.7 | 22.2   | --             | --   | 60.8           | 39.2               |
| N-CDs2 | 43.3        | 27.2 | 10.5 | 10.8          | 8.2            | 22.1 | 49.4 | 28.5 | --     | 18.4           | 30.0 | 28.3           | 23.4               |

**Tab. S3** Photophysical properties of prepared CDs. Decay times  $\tau_1$ ,  $\tau_2$  and  $\tau_3$ , relative amplitude (%), average decay times and PL QY%.

| CDs    | PH              | EM (nm) | $\tau_1$ (ns)<br>% | $\tau_2$ (ns)<br>% | $\tau_3$ (ns)<br>% | $\tau$ (ns) | $\chi^2$ | QY %  |
|--------|-----------------|---------|--------------------|--------------------|--------------------|-------------|----------|-------|
| CA-CDs | 3               | 435     | 1.18<br>(23.11)    | 4.33<br>(46.07)    | 11.08<br>(30.82)   | 8.24        | 1.008    | 7.19  |
|        | 7               | 435     | 0.93<br>(23.6)     | 4.25<br>(50.39)    | 11.86<br>(26)      | 8.43        | 1.083    | 5.15  |
|        | 11              | 435     | 0.99<br>(20.97)    | 3.92<br>(63.42)    | 13.03<br>(15.61)   | 7.67        | 1.031    | 5.17  |
| N-CDs1 | 3               | 460     | 2.3<br>(7.45)      | 6.98<br>(42.81)    | 12.66<br>(49.75)   | 10.68       | 1.025    | 25.80 |
|        | 7               | 440     | 3.80<br>(9.67)     | 12.35<br>(90.33)   | --                 | 12.08       | 1.033    | 29.92 |
|        | 11              | 440     | 4.03<br>(9.07)     | 11.26<br>(90.93)   | --                 | 11.01       | 1.086    | 21.33 |
| N-CDs2 | 3               | 460     | 4.99<br>(39.87)    | 9.96<br>(60.13)    | --                 | 8.72        | 1.065    | 32.48 |
|        | 7 <sup>a</sup>  | 440     | 4.31<br>(1.23)     | 14.54<br>(98.77)   | --                 | 14.50       | 1.046    | 67.89 |
|        |                 |         | 14.38<br>(100)     | --                 | --                 | 14.38       | 1.067    |       |
|        | 11 <sup>a</sup> | 440     | 2.18<br>(0.95)     | 10.32<br>(99.05)   | --                 | 10.30       | 1.034    | 39.07 |
|        |                 |         | 10.22<br>(100)     | --                 | --                 | 10.22       | 1.039    |       |

**a:** The time-resolved emission of N-CDs2 can be described by a mono-exponential decay function and double-exponential decay function at pH value of 7 and 11.

**Tab. 4** EDE or EIE PL properties of prepared CDs

| pH | EDE or EIE (Fluorescence and up-conversion fluorescence) |                      |                                |
|----|----------------------------------------------------------|----------------------|--------------------------------|
|    | CA-CDs<br>(N-free)                                       | N-CDs1<br>(N-doping) | N-CDs2<br>(N-doping and amino) |
| 3  | Strong EDE                                               | Middle EDE           | Slight EDE                     |
| 7  | Strong EDE                                               | EIE                  | EIE                            |
| 11 | Strong EDE                                               | EIE                  | EIE                            |
